# Supplementary material for: Carbon black as a colorimetric label for an immunochromatographic test strip for severe fever with thrombocytopenia syndrome virus detection
Source: Royal Society of Chemistry journal article supplement (doi:10.1039/d3an00515a), 2023-01-01
Supplement: d3an00515a1.pdf [file d3an00515a1.pdf]

## Electronic Supplementary Information

# Carbon Black as Colorimetric Labels of Immunochromatographic Test Strip for Severe Fever with Thrombocytopenia Syndrome Virus Detection

Hao Liu<sup>a,#</sup>, Fang Ji<sup>b,#</sup>, Shou-Nian Ding<sup>a\*</sup>

<sup>a</sup>Jiangsu Province Hi-Tech Key Laboratory for Bio-medical Research, School of Chemistry and  
Chemical Engineering, Southeast University, Nanjing 211189, P.R. China

<sup>b</sup>Jiangsu King's Luck Brewery Joint-Stock Co., Ltd., Lianshui 223411, China

\* Correspondence: [snding@seu.edu.cn](mailto:snding@seu.edu.cn)

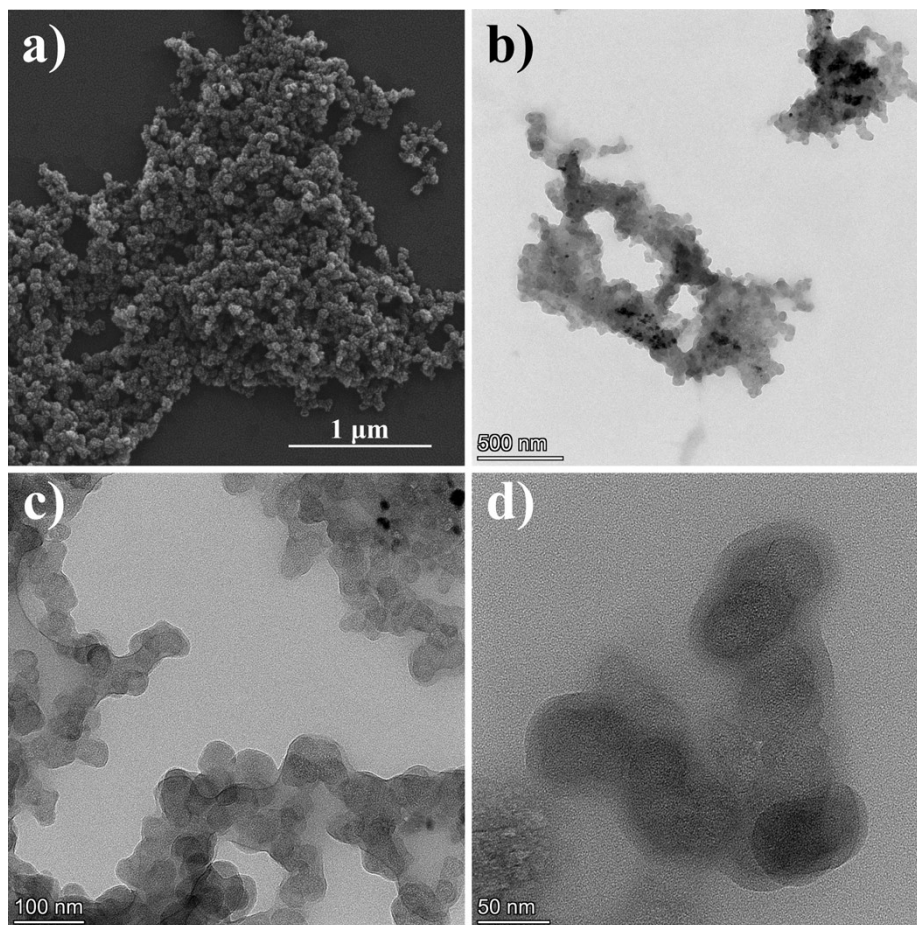

**Figure S1.** (a-b) SEM and TEM images of SB4 carbon black. (c-d) TEM images of CB-mAb.

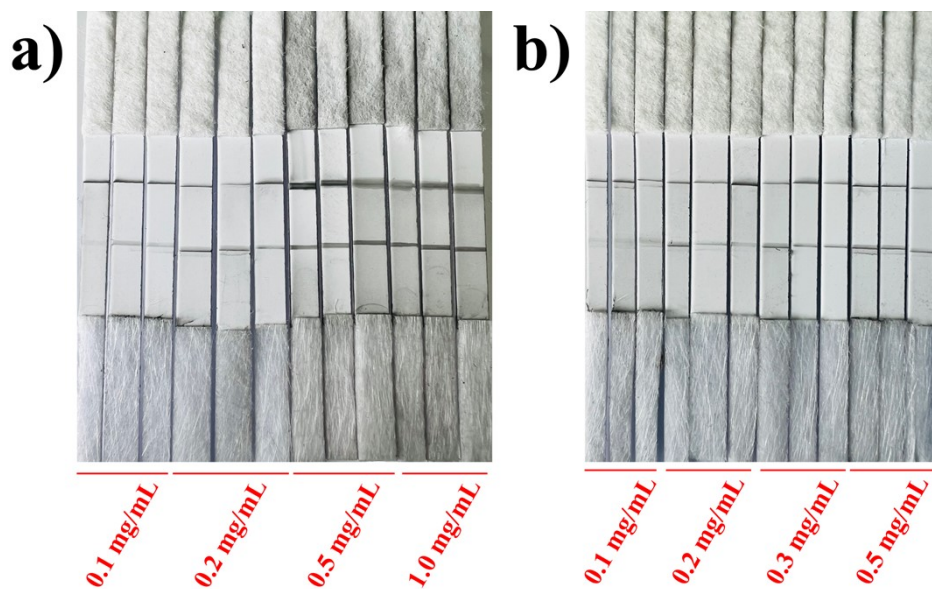

**Figure S2.** Optimization the concentration of carbon black (a) and anti-SFTSV mAb (b) in the CB-ICTS.

**Table S1.** Accuracy and Precision of CB-ICTS for detection of SFTSV (n = 3).

| Analyte | Added (ng/mL) | Found (ng/mL) | Recovery rate (%) | CV (%) |
|---------|---------------|---------------|-------------------|--------|
| SFTSV   | 200           | 210.75 ± 5.69 | 105.4             | 8.15   |
|         | 100           | 91.58 ± 2.61  | 91.58             | 11.28  |
|         | 10            | 10.45 ± 3.28  | 104.5             | 6.31   |
